# Supplementary material for: ERα activity depends on interaction and target site corecruitment with phosphorylated CREB1
Source: Life Sci Alliance. 2018 Jun 7;1(3):e201800055. doi: 10.26508/lsa.201800055 (PMC6238530; doi:10.26508/lsa.201800055)
Supplement: Supplementary file 1 [file LSA-2018-00055_TableS1.xlsx]

## Sheet: Table S3
	Supplementary Table S1. CREB1 shRNA constructs with expression vector pLKO.1
	shRNA	Design tool	Target sequence (5’-3’)
	shCREB1 S1	http://sirna.wi.mit.edu	AAGTATCCATTATTTGTCTCA
	shCREB1 S2	http://sirna.wi.mit.edu	TAGCAGTTGCTTTGTATATTA
	shCREB1 S3	http://sirna.wi.mit.edu	TGCTGGCTGTCTTTCTGTTAA
	shCREB1 S4	http://sirna.wi.mit.edu	ATGGCTAGGAGAGGCATTAAT
