# Supplementary material for: ERα activity depends on interaction and target site corecruitment with phosphorylated CREB1
Source: Life Sci Alliance. 2018 Jun 7;1(3):e201800055. doi: 10.26508/lsa.201800055 (PMC6238530; doi:10.26508/lsa.201800055)
Supplement: Supplementary file 2 [file LSA-2018-00055_TableS2.xlsx]

## Sheet: Table S1
	Supplementary Table S2. List of primers for gene expression experiments
	mRNA	Forward primers	Reverse primers
	TFF1	ATGGAGAACAAGGTGATCTG	ACCACAATTCTGTCTTTCAC
	BCL2	GGTGGGGTCA TGTGTGTGG	CGGTTCAGGT ACTCAGTCA TCC
	NFKB2	GGGCAGACCAGTGTCATTGAG	CCATGCCGATCCAGCAGAG
	CREB1	TGGAGTCATTCAGGCGGC	AGTTGAAATCTGAACTGTTTGGAC
	NRIP1	ATGCAGCAAAGCGGAAGAG	CCTTTAGGCACACTGTCAACC
	ABCA3	CTCCTCTGGAAGAACTACACCC	GGGCACATTTTCCGACTGAATC
	GAPDH	GCACAACAGGAAGAGAGAGACC	AGGGGAGA TTCAGTGTGGTG
