# Supplementary material for: ERα activity depends on interaction and target site corecruitment with phosphorylated CREB1
Source: Life Sci Alliance. 2018 Jun 7;1(3):e201800055. doi: 10.26508/lsa.201800055 (PMC6238530; doi:10.26508/lsa.201800055)
Supplement: Supplementary file 3 [file LSA-2018-00055_TableS3.xlsx]

## Sheet: Table S2
	Supplementary Table S3. List of primers for ChIP-qPCR experiments.
	ChIP-qPCR	Forward primers	Reverse primers
	GREB1	TAAATACTGCAGTAGAGATGG	GAGCTGCAAGCCTTCCATTG
	TFF1 promoter	GCTCTTTAAGCAAACAGAGC	TCTCTGCTCCAAAGGCGACC
	TFF1 enhancer	CTGCAGAAGTGATTCATAGTGAGAGAT	CACCCCGTGAGCCACTGT
	RARA	CGTGGGTCCTCTGGCTGTTC	CCGGGATAAAGCCACTCCAA
	MYC	AGGGCTTCTCAGAGGCTTG	CGGCTCTTCCACCCTAGC
	NFKB2	CACTTCATTTCCCTTCTCCTGAGCAG	TTCTTGCGGTCGGTCCCGGG
	NRIP1	TGCTCCTGGGTCCTACGTCT	TCCCCTTCACCCCACAACAC
	ABCA3	CACCTTCCATCTGTCCAAAG	CAACCCTGAGGTTTGGGAAC
	FGFR9	TGGCCCTTGATACTGGAGTC	GACATCCAAGGCAAGATGGT
	ADCY9	GACCCAGCTGTCACCCTATC	TCCCAGGGTACATGCTCAGA
	RET	GCAGGACCTTAAGGACAGCA	GGTGACCTTTCTGTGGTGGT
	ARHGEF26	AGGTCTAGATGTCCTGACTTGC	GGCAAATACCCATCTTCTTCCCT
	CCDC59	ATTCCTGTACCCGACAGTGG	TATTTTGTGGGCGTCCGTCG
	RBM42	CTCGCGCCCGAATGTATGAC	CTGTCTACTCTCCCCTTCGT
	MRPL55	GAGGCCACGCAGGAGATCAA	AGGGGCGTATATCTTCGTGTC
